# Supplementary material for: Potential Nutrition and Health Claims in Deastringed Persimmon Fruits (Diospyros kaki L.), Variety ‘Rojo Brillante’, PDO ’Ribera del Xúquer’
Source: MDPI journal article supplement (doi:10.3390/nu12051397), 2020-05-13

**Figure S2.** Chromatograms obtained for vitamin C analysis by HPLC-UV-visible: **(a)** Commercial standard of ascorbic acid; **(b)** Extract of destringed persimmon fruit 'Rojo Brillante' PDO 'Ribera del Xúquer'; **(c)** Extract of destringed persimmon fruit 'Rojo Brillante' PDO 'Ribera del Xúquer', after reduction with L-cystein. Chromatographic conditions: see text.

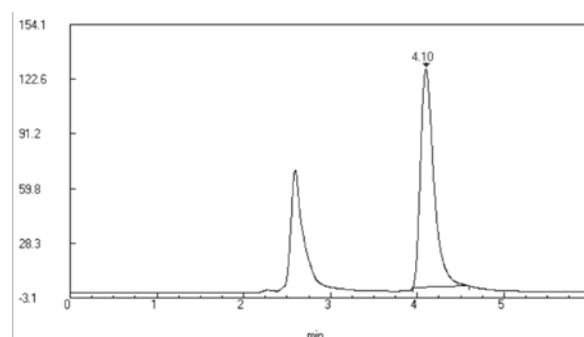

**(a)**

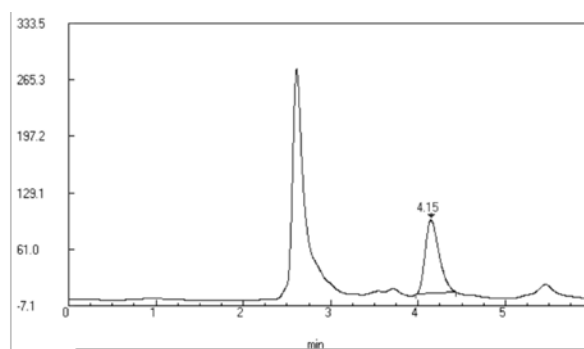

**(b)**

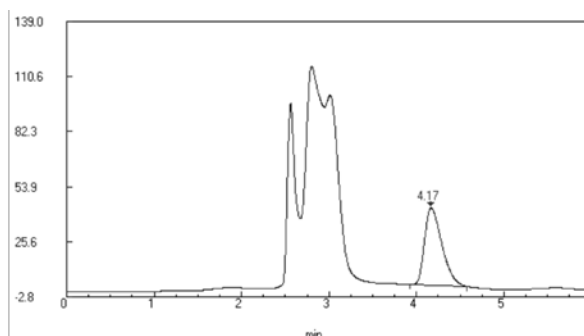

**(c)**

**Figure S3.** Chromatograms obtained for carotenoid analysis by HPLC-UV-visible: **(a)** Commercial standards; **(b)** Extract of destringed persimmon fruit 'Rojo Brillante' PDO 'Ribera del Xúquer'. Chromatographic conditions: see text.

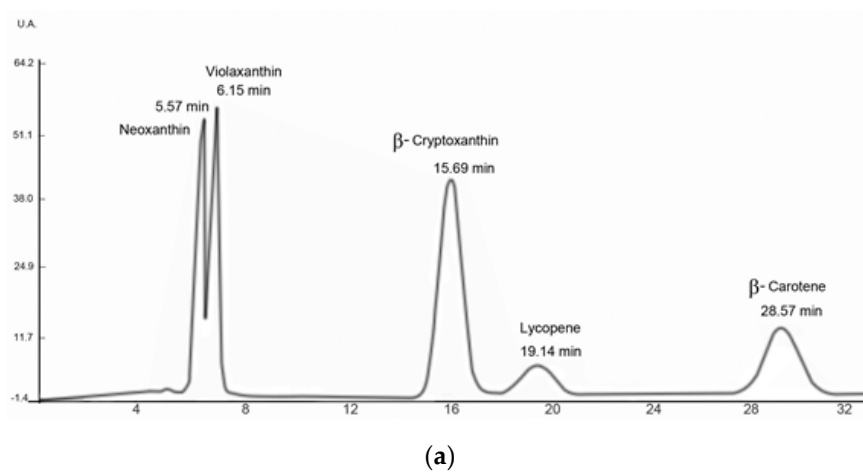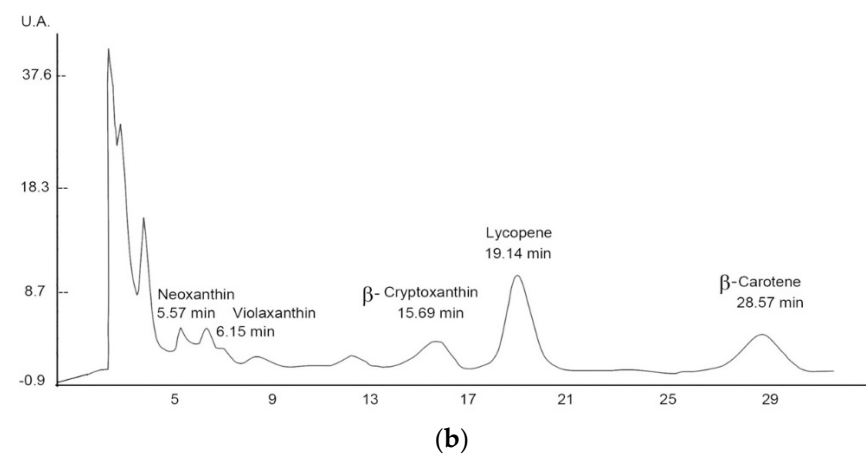

Supplement: s1 [file s1]
